# Supplementary material for: Personalized Medicine in Parkinson’s Disease: New Options for Advanced Treatments
Source: MDPI journal article supplement (doi:10.3390/jpm11070650), 2021-07-10
Supplement: s1 [file s1]

**Table S5. A list of concerns to check when considering LCIG**

|                                          | Major problem                                                                                                                                                                                                                                             | Minor problem                                                                                  |
|------------------------------------------|-----------------------------------------------------------------------------------------------------------------------------------------------------------------------------------------------------------------------------------------------------------|------------------------------------------------------------------------------------------------|
| Neurologist                              | Diagnostic certainty, Response to L-dopa,<br>High-risk medical complications of surgery<br>(cardiac disease, hypertension, diabetes,<br>nutritional status, obesity, respiratory<br>disease, renal disease, liver disease,<br>abnormal blood coagulation) | Age, Low-risk medical complications of<br>surgery                                              |
| Gastroenterologist<br>Colorectal surgeon | Removed stomach, Abdominal organ<br>position variation, Risk of surgical<br>complications                                                                                                                                                                 | Past history of abdominal Surgery,<br>Gallstones                                               |
| Psychiatrist                             | Severe dementia, Severe psychiatric<br>symptoms                                                                                                                                                                                                           | Dementia, Depression, Anxiety, Apathy,<br>ICD, DDS                                             |
| Therapist                                | High risk of falling,<br>High dependence on ADL                                                                                                                                                                                                           | Freezing of gait, Severe postural instability,<br>Abnormal posture of the trunk                |
| Nurse                                    | No caregivers                                                                                                                                                                                                                                             | Uncooperative caregivers, Lack of<br>therapeutic goals, Gap between expectation<br>and reality |
| Dentist                                  |                                                                                                                                                                                                                                                           | Dysphagia, Aspiration risk                                                                     |

LCIG: Levodopa-carbidopa intestinal gel; ICD: impulse control disorder; DDS: dopamine dysregulation syndrome; ADL: activities of daily living.
