# Supplementary material for: Personalized Medicine in Parkinson’s Disease: New Options for Advanced Treatments
Source: MDPI journal article supplement (doi:10.3390/jpm11070650), 2021-07-10
Supplement: s1 [file s1]

**Table S4. A list of concerns to check when considering DBS**

|              | Major problem                                                                                                                                                                                                                                             | Minor problem                                                                                    |
|--------------|-----------------------------------------------------------------------------------------------------------------------------------------------------------------------------------------------------------------------------------------------------------|--------------------------------------------------------------------------------------------------|
| Neurologist  | Diagnostic certainty, Response to L-dopa,<br>High-risk medical complications of surgery<br>(cardiac disease, hypertension, diabetes,<br>nutritional status, obesity, respiratory<br>disease, renal disease, liver disease,<br>abnormal blood coagulation) | Age, Freezing gait, Severe postural<br>instability, Low-risk medical complications<br>of surgery |
| Neurosurgeon | High-risk of surgical complications                                                                                                                                                                                                                       | Brain atrophy, Past history of brain surgery<br>and stroke                                       |
| Psychiatrist | Dementia, Severe depression, ICD,<br>Psychiatric symptoms                                                                                                                                                                                                 | Mild cognitive impairment, Depression,<br>Anxiety, Apathy, DDS                                   |
| Therapist    | High risk of falling,<br>High dependence on ADL                                                                                                                                                                                                           | Freezing of gait, Severe postural instability,<br>Abnormal posture of the trunk                  |
| Nurse        |                                                                                                                                                                                                                                                           | No caregivers, Lack of therapeutic goals,<br>Gap between expectation and reality                 |
| Dentist      |                                                                                                                                                                                                                                                           | Dysphagia, Aspiration risk                                                                       |

DBS: deep brain stimulation; ICD: impulse control disorder; DDS: dopamine dysregulation syn-drome; ADL: activities of daily living.
