# Supplementary material for: Personalized Medicine in Parkinson’s Disease: New Options for Advanced Treatments
Source: MDPI journal article supplement (doi:10.3390/jpm11070650), 2021-07-10
Supplement: s1 [file s1]

**Table S1. Comparison of DBS, MRgFUS, Radiofrequency, and Gamma Knife**

|                      | <b>DBS</b>                 | <b>MRgFUS</b> | <b>Radiofrequency</b> | <b>Gamma knife</b> |
|----------------------|----------------------------|---------------|-----------------------|--------------------|
| Tissue damage        | Minimum                    | +             | +                     | +                  |
| Reversibility        | +                          | -             | -                     | -                  |
| Adjustable           | +                          | -             | -                     | -                  |
| Anesthesia           | General (IPG implantation) | Local         | Local                 | Local              |
| Time to effect       | Immediate                  | Immediate     | Immediate             | One month          |
| Burr hole craniotomy | +                          | -             | +                     | -                  |

DBS: deep brain stimulation; MRgFUS: MR-guided focused ultrasound; IPG: Implantable Pulse Generator.
