# Supplementary material for: Personalized Medicine in Parkinson’s Disease: New Options for Advanced Treatments
Source: MDPI journal article supplement (doi:10.3390/jpm11070650), 2021-07-10
Supplement: s1 [file s1]

**Table S2. Effect of DBS on individual symptoms for each target**

|                      | STN | GPI | Thalamus (Vim) | PPN |
|----------------------|-----|-----|----------------|-----|
| Tremor               | +   | +   | ++             | -   |
| Bradykinesia         | ++  | +   | ±              | ±   |
| Rigidity             | ++  | ++  | +              | -   |
| Postural instability | +   | -   | -              | +   |
| Wearing-off          | ++  | ++  | -              | -   |
| Dyskinesia           | +   | ++  | -              | -   |
| Freezing of gait     | ±   | -   | -              | +   |
| Gait disturbance     | -   | -   | -              | +   |

++: Extremely effective; +: Effective; ±: Slightly effective; -: No effect.

DBS: Deep brain stimulation; STN: subthalamic nucleus; GPI: globus pallidus internus; Vim: ventrointermedius;

PPN: pedunculo pontine nucleus.
