# Supplementary material for: Personalized Medicine in Parkinson’s Disease: New Options for Advanced Treatments
Source: MDPI journal article supplement (doi:10.3390/jpm11070650), 2021-07-10
Supplement: s1 [file s1]

Table S3. Comparison of DBS and LCIG

|                                              | DBS | LCIG |
|----------------------------------------------|-----|------|
| Age >70 year                                 | △   | ○    |
| Age ≤70 year                                 | ○   | ○    |
| Moderate psychiatric symptoms due to illness | ×   | ○    |
| Moderate psychiatric symptoms due to drugs   | △   | ○    |
| Severe psychiatric symptoms                  | ×   | △    |
| Moderate cognitive dysfunction               | ×   | ○    |
| No caregiver                                 | △   | ×    |

○: Indication; △: Attention; ×: Ineligible.

DBS: Deep brain stimulation; LCIG: Levodopa-carbidopa intestinal gel.
