# Supplementary material for: Personalized Medicine in Parkinson’s Disease: New Options for Advanced Treatments
Source: J Pers Med. 2021 Jul 10;11(7):650. doi: 10.3390/jpm11070650 (PMC8303729; doi:10.3390/jpm11070650)
Supplement: Supplementary file 1 [file jpm-11-00650-s001.zip]

Archive with 5 entries (5 files):
- Personalized Medicine in PD Table S1.pdf
- Personalized Medicine in PD Table S2.pdf
- Personalized Medicine in PD Table S3.pdf
- Personalized Medicine in PD Table S4.pdf
- Personalized Medicine in PD Table S5.pdf
